# Supplementary material
Source: PubMed Central journal article supplement (PMC3696794)
Supplement: 1303061110_pnas.201303061SI.pdf [file 1303061110_pnas.201303061SI.pdf]

# Supporting Information

Haaker et al. 10.1073/pnas.1303061110

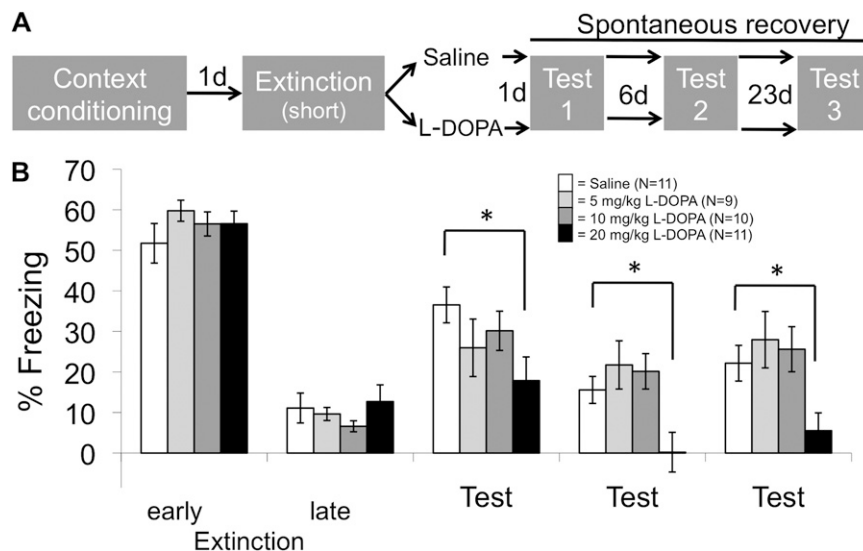

**Fig. S1.** Mouse study 1: Attenuation of spontaneous recovery of contextual fear by L-dopa (normalized data). Unlike Fig. 1, the figure shows the normalized data that were also used for statistics. Further, doses of 5 and 10 mg/kg are included. Administration of 20 mg/kg L-dopa directly after extinction learning (A) results in a long-term reduction of spontaneous recovery (B), as indexed by the percentage of time spent freezing. Gray fields in A indicate the context (identical on all days). Early extinction, first 4 min; late extinction, last 4 min. Data from tests 1–3 are normalized by subtraction to late extinction to appropriately quantify return of fear. \* $P < 0.05$  (two-tailed planned post hoc  $t$  tests on normalized data).

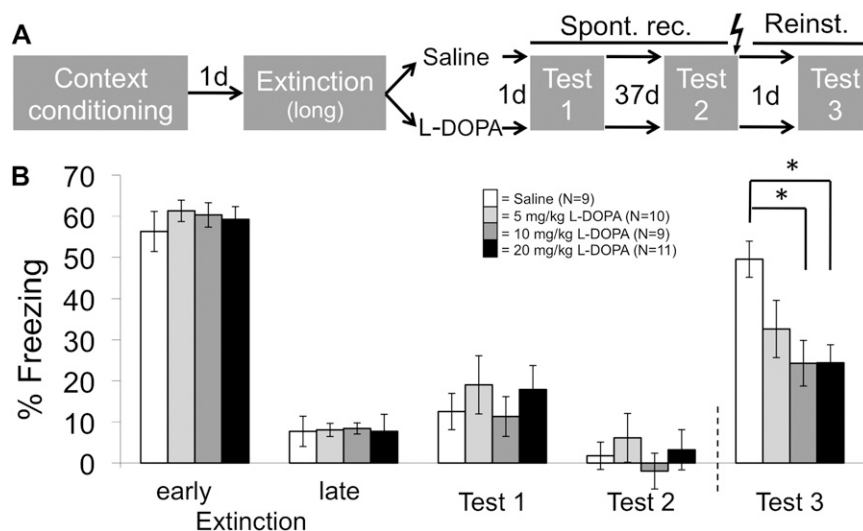

**Fig. S2.** Mouse study 2: Attenuation of reinstatement of contextual fear by L-dopa (normalized data). Unlike Fig. 2, this figure shows the normalized data that were also used for statistics. Further, doses 5 and 10 mg/kg are included. Administration of 10 and 20 mg/kg L-dopa directly after extinction learning (A) results in a reduction of reinstatement 40 d later (Reinst., Test 3) (B). Gray fields in A indicate the context (identical on all days). Lightning bolt denotes UCS. Data from tests 1 and 2 are normalized by subtraction to late extinction (to quantify spontaneous recovery); data from test 3 are normalized to data from test 2 (to quantify reinstatement). \* $P < 0.05$  (two-tailed planned post hoc  $t$  tests on normalized data).

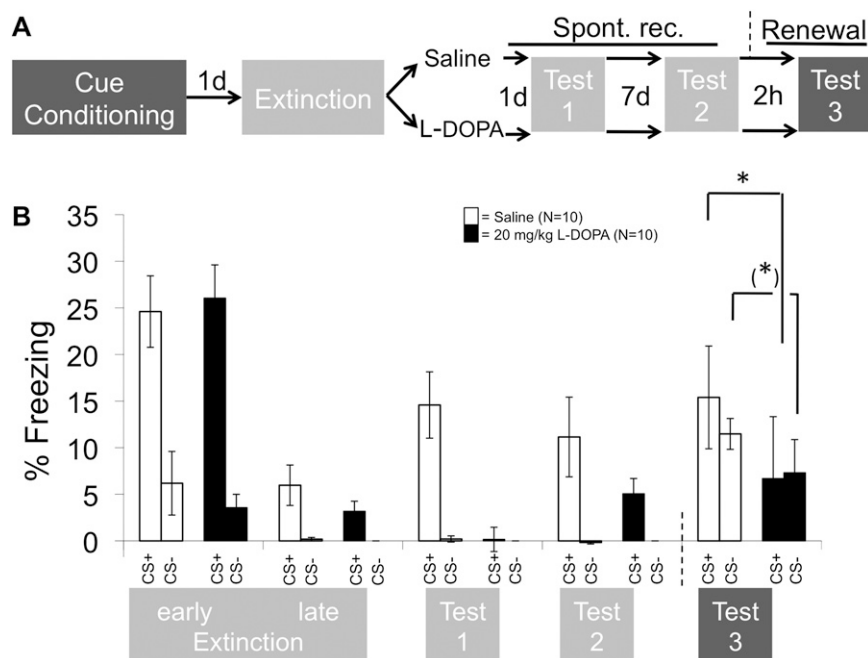

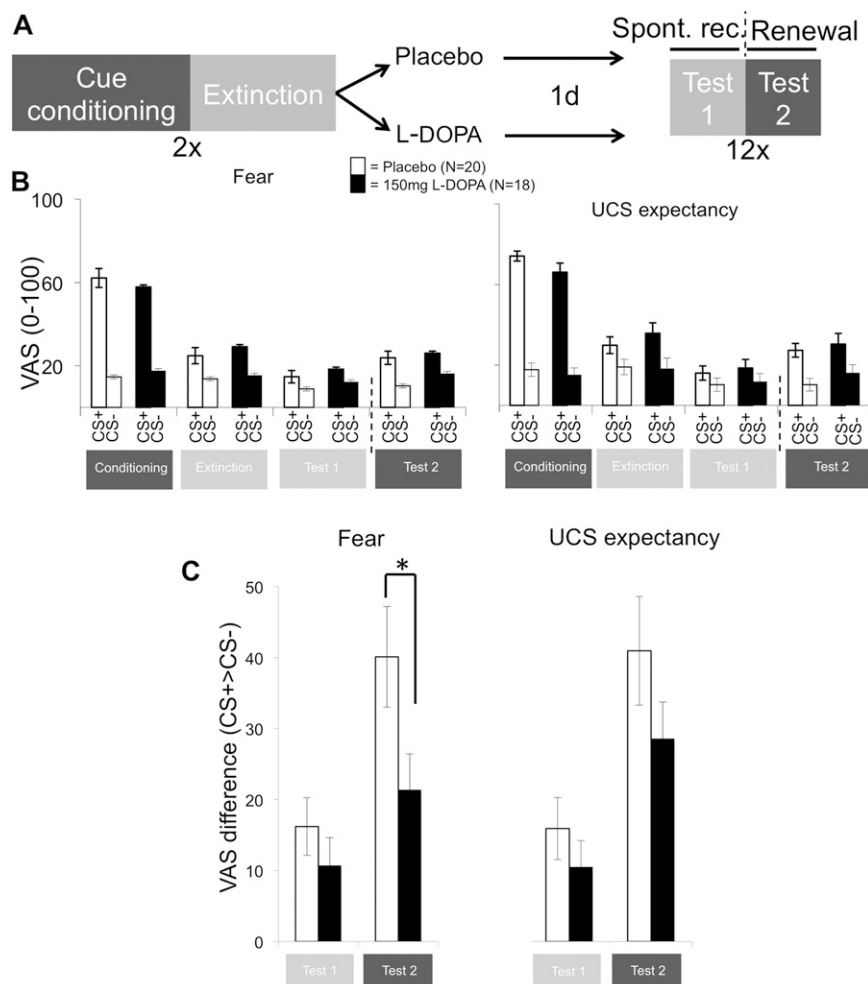

**Table S2. Statistics mouse study 2 (reinstatement of contextual fear): Percent time spent freezing**

| Effect                               | df, df error | F     | P                   | Eta <sup>2</sup> |
|--------------------------------------|--------------|-------|---------------------|------------------|
| Extinction                           |              |       |                     |                  |
| Time (early, late)                   | 1,35         | 578.1 | <0.001*             | 0.94             |
| Group (0, 5, 10, 20 mg/kg)           | 3,35         | 0.2   | 0.9                 | 0.02             |
| Time × group                         | 3,35         | 0.21  | 0.89                | 0.02             |
| Spontaneous recovery (tests 1 and 2) |              |       |                     |                  |
| Time (test 1, test 2)                | 1,35         | 39.6  | <0.001 <sup>†</sup> | 0.53             |
| Group (0, 5, 10, 20 mg/kg)           | 3,35         | 0.25  | 0.86                | 0.21             |
| Time × group                         | 3,35         | 0.63  | 0.6                 | 0.05             |
| Reinstatement (test 3)               |              |       |                     |                  |
| Group (0, 5, 10, 20 mg/kg)           | 3,35         | 3.13  | 0.038 <sup>‡</sup>  | 0.21             |

\*Early > late (indicating successful conditioning and extinction).

<sup>†</sup>Test 1 > test 2.

<sup>‡</sup>Post hoc: 20 < 0,  $P = 0.01$ ; 10 < 0,  $P = 0.013$ ; 5 < 0,  $P = 0.081$ ; all others  $P > 0.36$ .

**Table S3. Statistics mouse study 3 (renewal of cued fear): Percent time spent freezing**

| Effect                               | df, df error | F     | P                   | Eta <sup>2</sup> |
|--------------------------------------|--------------|-------|---------------------|------------------|
| Extinction                           |              |       |                     |                  |
| Time (early, late)                   | 1,18         | 56.65 | <0.001*             | 0.76             |
| Cue (CS+, CS−)                       | 1,18         | 69.54 | <0.001 <sup>†</sup> | 0.79             |
| Group (0, 20 mg/kg)                  | 1,18         | 0.31  | 0.58                | 0.02             |
| Time × cue                           | 1,18         | 19.80 | <0.001 <sup>‡</sup> | 0.52             |
| Time × group                         | 1,18         | 0.07  | 0.80                | 0.00             |
| Cue × group                          | 1,18         | 0.06  | 0.81                | 0.00             |
| Time × cue × group                   | 1,18         | 0.87  | 0.36                | 0.05             |
| Spontaneous recovery (tests 1 and 2) |              |       |                     |                  |
| Time (tests 1 and 2)                 | 1,18         | 0.3   | 0.59                | 0.02             |
| Cue (CS+, CS−)                       | 1,18         | 17.91 | 0.001 <sup>†</sup>  | 0.5              |
| Group (0, 20 mg/kg)                  | 1,18         | 7.62  | 0.012 <sup>§</sup>  | 0.3              |
| Time × cue                           | 1,18         | 0.3   | 0.59                | 0.02             |
| Time × group                         | 1,18         | 0.3   | 0.59                | 0.02             |
| Cue × group                          | 1,18         | 7.73  | 0.013 <sup>¶</sup>  | 0.3              |
| Time × cue × group                   | 1,18         | 0.3   | 0.59                | 0.02             |
| Renewal (test 3)                     |              |       |                     |                  |
| Cue (CS+, CS−)                       | 1,18         | 0.89  | 0.36                | 0.05             |
| Group (0, 20 mg/kg)                  | 1,18         | 6.25  | 0.022 <sup>  </sup> | 0.26             |
| Cue × group                          | 1,18         | 2     | 0.18                | 0.1              |

As in earlier work, only the first two CS+ and CS− presentations each were counted based on repeated prior observations that CRs to CS+ strongly decrease after the first two presentations (online extinction).

\*Early > late.

<sup>†</sup>CS+ > CS−.

<sup>‡</sup>(CS+ > CS−)early > (CS+ > CS−)late (indicating successful conditioning and extinction).

<sup>§</sup>0 > 20.

<sup>¶</sup>CS+ in 0 > CS+ in 20 (indicating attenuated spontaneous recovery by L-dopa).

<sup>||</sup>0 > 20 (indicating attenuated general renewal by L-dopa).
